# Supplementary material for: CCAAT/enhancer-binding protein α is required for hepatic outgrowth via the p53 pathway in zebrafish
Source: PubMed Central journal article supplement (PMC4649991; doi:10.1038/srep15838), 2015-10-29
Supplement: srep15838-s1.pdf [file srep15838-s1.pdf]

**CCAAT/enhancer-binding protein  $\alpha$  is required for hepatic outgrowth via the  
p53 pathway in zebrafish**

Hao Yuan<sup>1</sup>, Bin Wen<sup>1</sup>, Xiaohui Liu<sup>1</sup>, Ce Gao<sup>2</sup>, Ruimeng, Yang<sup>1</sup>, Luxiang Wang<sup>1</sup>, Saijuan Chen<sup>1</sup>, Zhu Chen<sup>1</sup>, Hugues de The<sup>1,3</sup>, Jun Zhou<sup>1,\*</sup> and Jun Zhu<sup>1,3,\*</sup>

**Supplemental figure legends**

**Fig. S1. *cebpa* is expressed in the developing liver.** (A-C) WISH assay of *cebpa* from 24 to 48 hpf. White arrows indicate the liver-forming region. A-C, lateral views, dorsal to the right. A'-C', dorsal views, anterior to the top.

**Fig. S2. *cebpa* mutant embryos display a small liver phenotype.** (A-B) WISH assay of *lfabp* at 5 dpf. Dashed lines circle the boundary of the liver. Lateral views, dorsal to the top.

**Fig. S3. Additional loss of p53 could rescue the defects of cell proliferation and apoptosis observed in *cebpa*-deficient liver.** (A-F) Hepatic cell proliferation and apoptosis were determined by pH3 staining and TUNEL assay in 72 hpf embryos, respectively. The sections were counterstained with DAPI to label the nucleus. Dashed lines circle the boundary of the liver. White arrows indicate pH3 or TUNEL positive cells, respectively. In each case, more than 5 sections from at least three sibling control or *cebpa-p53* double mutant fish were examined. I, intestine. (G-H) Quantification of hepatic cell proliferation and apoptosis, respectively. Data shown are the mean  $\pm$  SD,  $n \geq 3$ , \* $P < 0.05$  by student's *t*-test. NS, not significant.

**Fig. S4. The transcriptional level of *p53* was unaffected in *cebpa* mutant. (A)**

Quantitative PCR analysis of the expression of *p53* in 72 hpf embryos. Data shown are the mean  $\pm$  SD of three independent experiments. NS, not significant.

**Figure S1**

*cebpa*

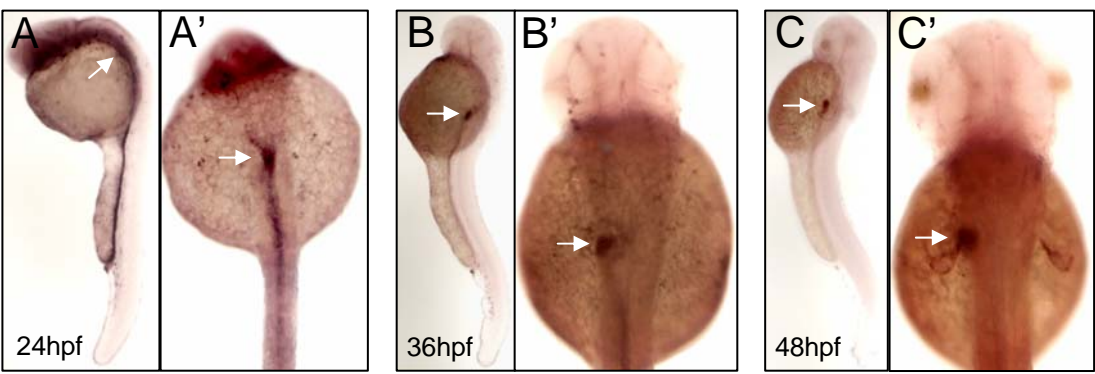

**Figure S2**

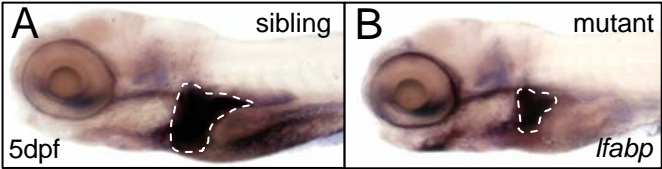

**Figure S3**

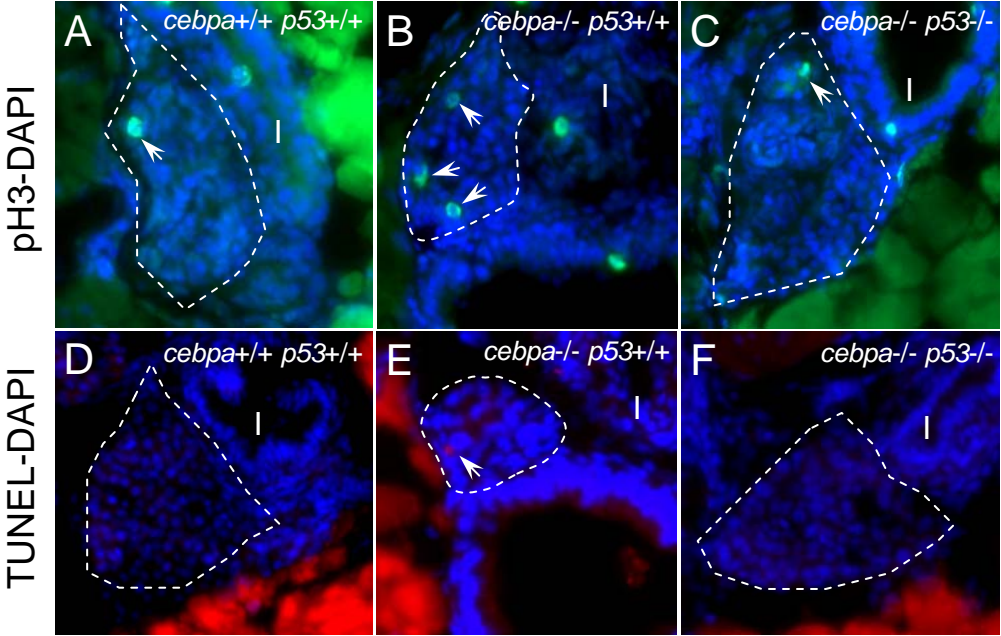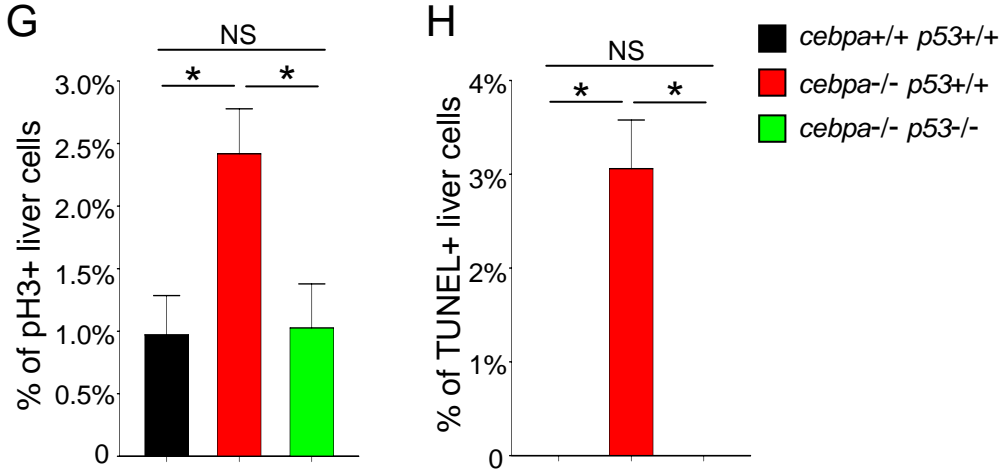

**Figure S4**

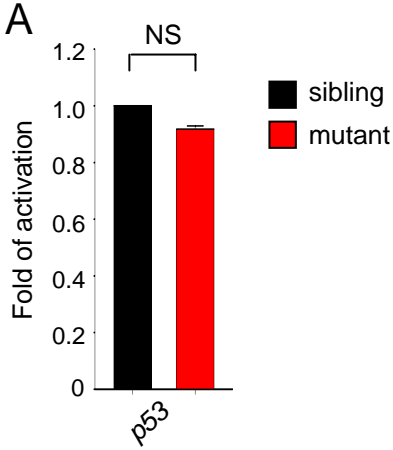

**Table S1. Primer sequences of quantitative PCR.**

| Gene         | primer sequences                               |
|--------------|------------------------------------------------|
| <i>jun</i>   | AGGAGAGCCGAAGGACATTT<br>CAGACATCAAGCCCCTGAA    |
| <i>myc</i>   | AGCAGTAGTGACAGCGAATCC<br>CCGTGACCACGTCAATTTCT  |
| <i>bcl2</i>  | TGAGGCTCTACCGGGTGTTA<br>TCGCGTTGGTAAATCCTTTC   |
| <i>bcl2l</i> | GGCTTGTTTGCTTGGTTGAC<br>TGGTGCAATGGCTCATACC    |
| <i>gapdh</i> | TTGAGAAACCTGCCAAGTATGA<br>CCCATTGAAGTCAGTGGACA |
